# Supplementary material for: One-pot synthesis and microstructure analysis of Fe-doped NiS2 for efficient oxygen evolution electrocatalysis
Source: Royal Society of Chemistry journal article supplement (doi:10.1039/d2ma00447j), 2022-01-01
Supplement: d2ma00447j1.pdf [file d2ma00447j1.pdf]

# **One-pot synthesis and microstructure analysis of Fe doped NiS<sub>2</sub> for efficient oxygen evolution electrocatalysis**

Haofei Zhao, † Wenrui Li † and Rongming Wang \*

*Beijing Advanced Innovation Center for Materials Genome Engineering, Beijing Key Laboratory  
for Magneto-Photoelectrical Composite and Interface Science, School of Mathematics and  
Physics, University of Science and Technology Beijing, Beijing 100083, China.*

*E-mail: [rmwang@ustb.edu.cn](mailto:rmwang@ustb.edu.cn)*

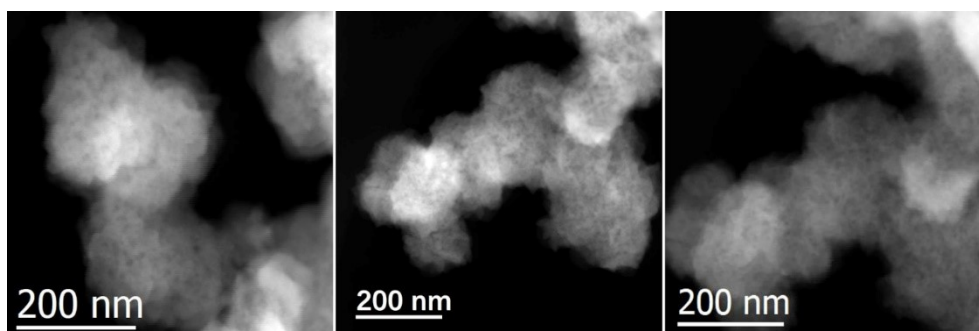

Fig. S1 Annular dark-field images of nanoparticles of as-prepared NiS<sub>2</sub>.

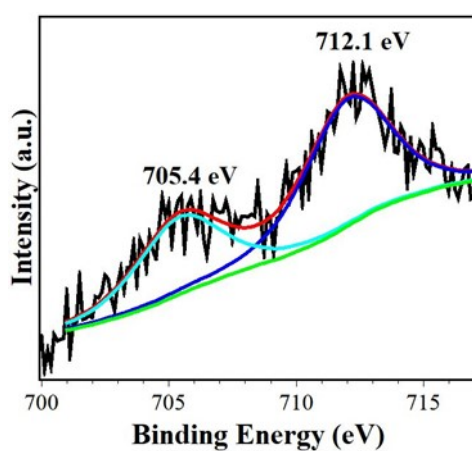

Fig. S2 XPS spectrum of NiS<sub>2</sub> ranging from 700 eV and 717 eV, exhibiting two Ni LMM Auger peaks. The fitted positions of the two peaks are 705.4 eV and 712.1 eV, respectively, with an area ratio of 0.6. The fitted FWHM and Lorentzian character percent are 4.0 eV and 45%, respectively.

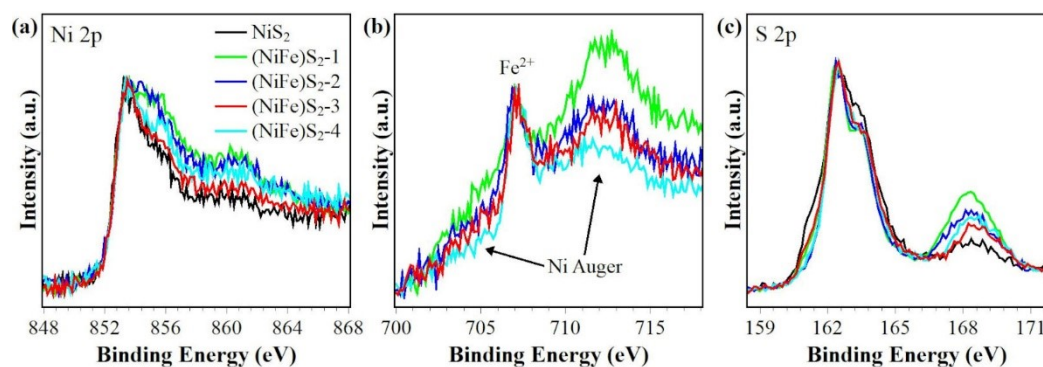

Fig. S3 (a) Ni 2p, (b) Fe 2p and (c) S 2p XPS spectra of the as-synthesized samples. The patterns are all normalized for comparison.

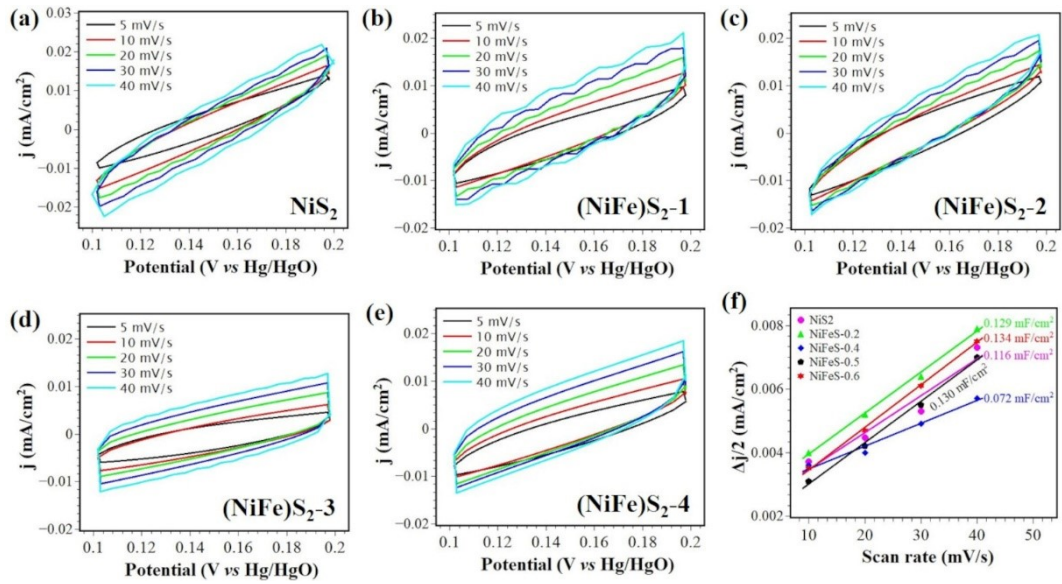

Fig. S4 (a-e) Cyclic voltammograms tested in a non-Faradic potential range of 0.1 – 0.2 V vs Hg/HgO and (f) Capacitive currents as a function of scan rate of  $\text{NiS}_2$ ,  $(\text{NiFe})\text{S}_2\text{-1}$ ,  $(\text{NiFe})\text{S}_2\text{-2}$ ,  $(\text{NiFe})\text{S}_2\text{-3}$  and  $(\text{NiFe})\text{S}_2\text{-4}$ .

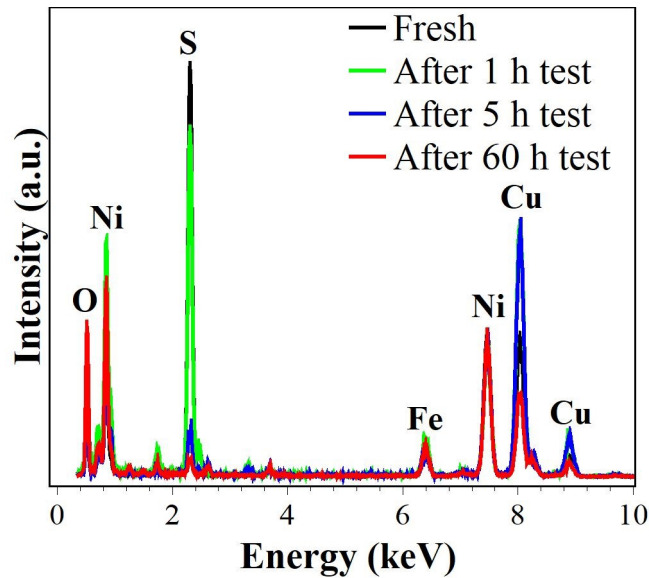

Fig. S5 Comparison of the EDX spectra of  $(\text{NiFe})\text{S}_2\text{-3}$  after being tested for different times at  $\sim 20 \text{ mA/cm}^2$ .

Table S1 Summarization of fitting parameters of the XRD data using MAUD and the Fe contents measured by EDX quantification analysis.

| Sample                  | Lattice parameter (Å) | Crystallite size (nm) | Rwp (%) | Fe content (%) |
|-------------------------|-----------------------|-----------------------|---------|----------------|
| NiS <sub>2</sub>        | 5.6803 (6)            | 34.0 (4)              | 4.83    | 0              |
| (NiFe)S <sub>2</sub> -1 | 5.6722 (6)            | 46.5 (6)              | 5.59    | 5.9            |
| (NiFe)S <sub>2</sub> -2 | 5.6632 (5)            | 37.1(3)               | 5.28    | 12.5           |
| (NiFe)S <sub>2</sub> -3 | 5.6483 (9)            | 24.7 (5)              | 6.13    | 16.3           |
| (NiFe)S <sub>2</sub> -4 | 5.6114 (13)           | 20.8 (1.1)            | 6.02    | 29.0           |

Table S2 Summarization of fitting parameters of the Ni 2p XPS spectra.

| Samples                 | Ni <sup>2+</sup> 2p <sub>3/2</sub> |           |      | Ni <sup>3+</sup> 2p <sub>3/2</sub> |           |      | Sat.      |           |      |
|-------------------------|------------------------------------|-----------|------|------------------------------------|-----------|------|-----------|-----------|------|
|                         | B.E. (eV)                          | FWHM (eV) | Area | B.E. (eV)                          | FWHM (eV) | Area | B.E. (eV) | FWHM (eV) | Area |
| NiS <sub>2</sub>        | 853.33                             | 1.74      | 1.00 | 855.24                             | 2.40      | 0.71 | 858.74    | 5.51      | 0.53 |
| (NiFe)S <sub>2</sub> -1 | 853.51                             | 1.86      | -    | 855.59                             | 2.67      | 1.13 | 859.58    | 6.09      | 1.40 |
| (NiFe)S <sub>2</sub> -2 | 853.59                             | 1.89      | -    | 855.52                             | 2.67      | 1.02 | 859.72    | 6.46      | 1.31 |
| (NiFe)S <sub>2</sub> -3 | 853.43                             | 1.72      | -    | 855.40                             | 2.48      | 0.76 | 859.03    | 5.89      | 0.72 |
| (NiFe)S <sub>2</sub> -4 | 853.49                             | 1.69      | -    | 855.46                             | 2.47      | 0.98 | 859.38    | 7.10      | 1.26 |

Table S3 Summarization of fitting parameters of the S 2p XPS spectra.

| Samples                 | S <sub>2</sub> <sup>2-</sup> 2p <sub>3/2</sub> |           |      | S <sup>2-</sup> |           |       | S <sub>n</sub> <sup>2-</sup> |           |       | SO <sub>4</sub> <sup>2-</sup> |           |       |
|-------------------------|------------------------------------------------|-----------|------|-----------------|-----------|-------|------------------------------|-----------|-------|-------------------------------|-----------|-------|
|                         | B.E. (eV)                                      | FWHM (eV) | Area | B.E. (eV)       | FWHM (eV) | Area  | B.E. (eV)                    | FWHM (eV) | Area  | B.E. (eV)                     | FWHM (eV) | Area  |
| NiS <sub>2</sub>        | 162.35                                         | 1.03      | 1    | 161.31          | 1.05      | 0.389 | 164.43                       | 1.43      | 0.372 | 168.35                        | 2.64      | 0.420 |
| (NiFe)S <sub>2</sub> -1 | 162.42                                         | 1.03      | -    | 161.35          | 1.18      | 0.236 | 164.03                       | 0.95      | 0.224 | 168.27                        | 2.53      | 0.903 |

|                         |        |      |   |        |      |       |        |      |       |        |      |       |
|-------------------------|--------|------|---|--------|------|-------|--------|------|-------|--------|------|-------|
| (NiFe)S <sub>2</sub> -2 | 162.42 | 1.11 | - | 161.18 | 1.20 | 0.098 | 164.25 | 1.11 | 0.148 | 168.27 | 2.60 | 0.640 |
| (NiFe)S <sub>2</sub> -3 | 162.45 | 1.15 | - | 161.36 | 1.15 | 0.266 | 164.19 | 1.94 | 0.479 | 168.62 | 2.36 | 0.507 |
| (NiFe)S <sub>2</sub> -4 | 162.45 | 1.10 | - | 161.28 | 1.20 | 0.137 | 164.52 | 1.84 | 0.305 | 168.54 | 2.52 | 0.599 |

Table S4 Overpotentials at 10 mA/cm<sup>2</sup>, Tafel slopes and fitting parameters of the EIS data.

| Samples                 | $\eta_{10}$ (mV) | Tafel slope (mV/dec) | $C_{dl}$ (mF/cm <sup>2</sup> ) | $R_s$ ( $\Omega$ ) | $R_{ct1}$ ( $\Omega$ ) | CPE <sub>1</sub> | $R_{ct2}$ ( $\Omega$ ) | CPE <sub>2</sub> |
|-------------------------|------------------|----------------------|--------------------------------|--------------------|------------------------|------------------|------------------------|------------------|
| NiS <sub>2</sub>        | 411              | 89.8                 | 0.116                          | 1.389              | 1.705                  | 0.628            | 3.292                  | 0.615            |
| (NiFe)S <sub>2</sub> -1 | 303              | 59.5                 | 0.129                          | 1.386              | 0.753                  | 0.618            | 1.823                  | 0.766            |
| (NiFe)S <sub>2</sub> -2 | 337              | 77.3                 | 0.072                          | 1.511              | 0.784                  | 0.87             | 2.609                  | 0.651            |
| (NiFe)S <sub>2</sub> -3 | 257              | 41.2                 | 0.130                          | 1.675              | 0.883                  | 0.546            | 1.404                  | 0.778            |
| (NiFe)S <sub>2</sub> -4 | 295              | 59.6                 | 0.134                          | 1.559              | 0.537                  | 0.447            | 0.97                   | 0.93             |

Table S5 Comparison of the electrocatalytic OER activity of (NiFe)S<sub>2</sub>-3 with various transition-metal based catalysts in 1 M KOH electrolyte.

| Catalyst / Pre-catalyst                                                  | $\eta_{10}$ (mV) | Tafel slope (mV/dec) | Reference |
|--------------------------------------------------------------------------|------------------|----------------------|-----------|
| <b>(NiFe)S<sub>2</sub>-3</b>                                             | 257              | 41                   | This work |
| <b>Fe<sub>0.1</sub>Ni<sub>0.9</sub>S<sub>2</sub> nanosheets</b>          | 260              | 46                   | 1         |
| <b>(NiFe)S<sub>2</sub></b>                                               | 230              | 42.6                 | 2         |
| <b>(NiFe)S<sub>2</sub>@Graphene</b>                                      | 320              | 61                   | 3         |
| <b>Ni<sub>6/7</sub>Fe<sub>1/7</sub>-OH-6/CNT derived from disulfides</b> | 190              | 24                   | 4         |

|                                                                                            |     |      |    |
|--------------------------------------------------------------------------------------------|-----|------|----|
| <b>Fe doped Ni<sub>3</sub>S<sub>2</sub> in mesoporous carbon</b>                           | 350 | 93   | 5  |
| <b>V<sub>0.1</sub>Ni<sub>0.9</sub>S<sub>2</sub> nanosheets</b>                             | 290 | 45   | 6  |
| <b>(Ni,Co)S<sub>2</sub></b>                                                                | 270 | 58   | 7  |
| <b>Fe<sub>0.2</sub>Co<sub>0.8</sub>S<sub>2</sub></b>                                       | 290 | 52.6 | 8  |
| <b>Co<sub>0.25</sub>Fe<sub>0.75</sub>S<sub>2</sub></b>                                     | 324 | 50   | 9  |
| <b>Co-FeS<sub>2</sub>/CoS<sub>2</sub></b>                                                  | 278 | 73   | 10 |
| <b>Ni doped Co<sub>3</sub>S<sub>4</sub> nanowires</b>                                      | 283 | 65   | 11 |
| <b>Ni<sub>3</sub>S<sub>2</sub>@NiV-LDH</b>                                                 | 190 | 57   | 12 |
| <b>NiFe–NiFe<sub>2</sub>O<sub>4</sub> composite nanofibers</b>                             | 316 | 74   | 13 |
| <b>CoS<sub>2</sub>/Ni foam</b>                                                             | 298 | 94   | 14 |
| <b>Ni<sub>3</sub>S<sub>2</sub> nanosheets/Ni foam</b>                                      | 223 | 60.5 | 15 |
| <b>NiCoP/C</b>                                                                             | 330 | 96   | 16 |
| <b>Fe-O<sub>x</sub>/Fe foam</b>                                                            | 238 | 82.7 | 17 |
| <b>h-NiS<sub>x</sub>/Ni foam</b>                                                           | 180 | 96   | 18 |
| <b>FeOOH decorated CoP porous nanofiber</b>                                                | 250 | 56.6 | 19 |
| <b>Mn-doped CoP nanosheets</b>                                                             | 288 | 77.2 | 20 |
| <b>Ni/FeOOH@NiFe<sub>2</sub>O<sub>4</sub> derived from Ni<sub>5</sub>P<sub>4</sub>@FeP</b> | 205 | 42.3 | 21 |
| <b>monolayer (NiCo)(OH)<sub>2</sub> on GC electrode</b>                                    | 208 | -    | 22 |
| <b>Ultrathin NiFe LDH</b>                                                                  | 210 | 30   | 23 |
| <b>Zn-doped NiFeO<sub>x</sub>H<sub>y</sub></b>                                             | 250 | 28.3 | 24 |

## References:

- 1 X. Ding, W. Li, H. Kuang, M. Qu, M. Cui, C. Zhao, D. C. Qi, F. E. Oropeza and K. H. L. Zhang, *Nanoscale*, 2019, **11**, 23217–23225.
- 2 M. Zhou, Q. Weng, X. Zhang, X. Wang, Y. Xue, X. Zeng, Y. Bando and D. Golberg, *J. Mater. Chem. A*, 2017, **5**, 4335–4342.
- 3 C. Liu, H. Ma, M. Yuan, Z. Yu, J. Li, K. Shi, Z. Liang, Y. Yang, T. Zhu, G. Sun, H. Li and S. Ma, *Electrochim. Acta*, 2018, **286**, 195–204.
- 4 T. Wang, G. Nam, Y. Jin, X. Wang, P. Ren, M. G. Kim, J. Liang, X. Wen, H. Jang, J. Han, Y. Huang, Q. Li and J. Cho, *Adv. Mater.*, 2018, **30**, 1–9.
- 5 C. Han, W. Li, C. Shu, H. Guo, H. Liu, S. Dou and J. Wang, *ACS Appl. Energy Mater.*, 2019, **2**, 5363–5372.
- 6 H. Liu, Q. He, H. Jiang, Y. Lin, Y. Zhang, M. Habib, S. Chen and L. Song, *ACS Nano*, 2017, **11**, 11574–11583.
- 7 J. Zhang, X. Bai, T. Wang, W. Xiao, P. Xi, J. Wang, D. Gao and J. Wang, *Nano-Micro Lett.*, 2019, **11**, 2.
- 8 Y. Zhou, M. Luo, Z. Zhang, W. Li, X. Shen, W. Xia, M. Zhou and X. Zeng, *Appl. Surf. Sci.*, 2018, **448**, 9–15.
- 9 L. Gao, C. Guo, X. Liu, X. Ma, M. Zhao, X. Kuang, H. Yang, X. Zhu, X. Sun and Q. Wei, *New J. Chem.*, 2020, **44**, 1711–1718.
- 10 K. Wang, W. Guo, S. Yan, H. Song and Y. Shi, *RSC Adv.*, 2018, **8**, 28684–28691.
- 11 S. Tang, X. Wang, Y. Zhang, M. Courté, H. J. Fan and D. Fichou, *Nanoscale*, 2019, **11**, 2202–2210.
- 12 Q. Liu, J. Huang, Y. Zhao, L. Cao, K. Li, N. Zhang, D. Yang, L. Feng and L. Feng, *Nanoscale*, 2019, **11**, 8855–8863.
- 13 R. A. Raimundo, V. D. Silva, E. S. Medeiros, D. A. Macedo, T. A. Simões, U. U. Gomes, M. A. Morales and R. M. Gomes, *J. Phys. Chem. Solids*, , DOI:10.1016/j.jpcs.2019.109325.
- 14 I. K. Ahn, W. Joo, J. H. Lee, H. G. Kim, S. Y. Lee, Y. Jung, J. Y. Kim, G. B. Lee, M. Kim and Y. C. Joo, *Sci. Rep.*, 2019, **9**, 1–10.
- 15 M. Yao, B. Sun, L. He, N. Wang, W. Hu and S. Komarneni, *ACS Sustain. Chem. Eng.*, 2019, **7**, 5430–5439.
- 16 P. He, X. Y. Yu and X. W. D. Lou, *Angew. Chemie - Int. Ed.*, 2017, **56**, 3897–3900.
- 17 X. Zou, Y. Wu, Y. Liu, D. Liu, W. Li, L. Gu, H. Liu, P. Wang, L. Sun and Y. Zhang, *Chem*, 2018, **4**, 1139–1152.
- 18 B. You and Y. Sun, *Adv. Energy Mater.*, 2016, **6**, 1–7.
- 19 J. Cheng, B. Shen, Y. Song, J. Liu, Q. Ye, M. Mao and Y. Cheng, *Chem. Eng. J.*, 2022, **428**, 131130.
- 20 Y. Liu, N. Ran, R. Ge, J. Liu, W. Li, Y. Chen, L. Feng and R. Che, *Chem. Eng. J.*, 2021, **425**, 131642.
- 21 Y. Li, Y. Wu, H. Hao, M. Yuan, Z. Lv, L. Xu and B. Wei, *Appl. Catal. B Environ.*, 2022, **305**, 121033.
- 22 J. Kang, X. Qiu, Q. Hu, J. Zhong, X. Gao, R. Huang, C. Wan, L. M. Liu, X. Duan and L. Guo, *Nat. Catal.*, 2021, **4**, 1050–1058.
- 23 C. Kuai, Y. Zhang, D. Wu, D. Sokaras, L. Mu, S. Spence, D. Nordlund, F. Lin and X. W. Du, *ACS Catal.*, 2019, **9**, 6027–6032.
